# Supplementary material
Source: Springer Nature journal article supplement (https://www.springermedizin.de/resource/supplementary/12881_2012_1175_MOESM3_ESM.pdf/9452056)

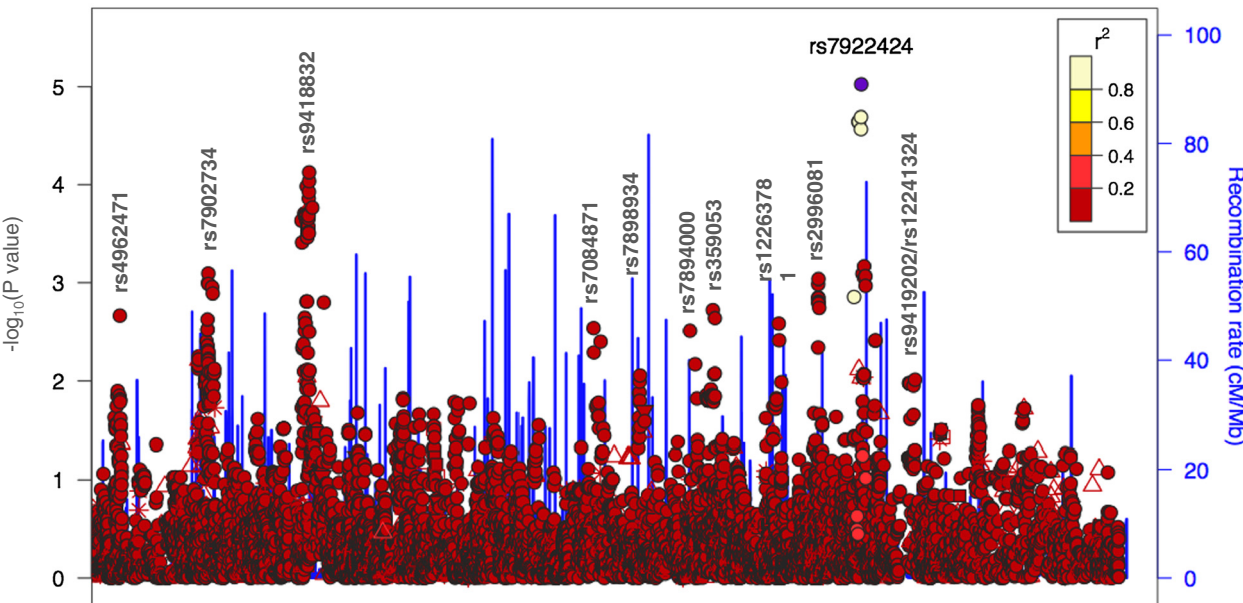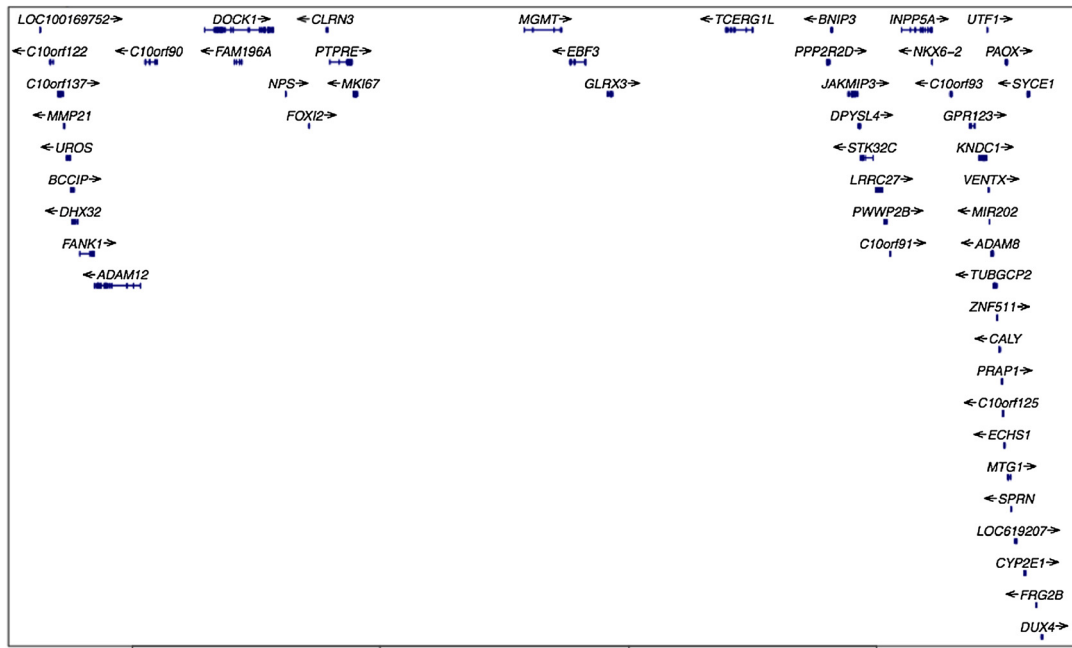

Position on chr10 (Mb)

Supplement: MOESM3 [file 9452056]
